# Supplementary material for: A novel diagnostic model for insulinoma
Source: Research Square preprint supplement (doi:10.21203/rs.3.rs-1634448/v1), 2022-05-18
Supplement: Supplementary file 1 [file dd4e55c02e3f748e0ef5c8fd.docx]

STROBE Statement—Checklist of items that should be included in reports of ***cohort studies***

|  | Item No | Recommendation | Page No |
| --- | --- | --- | --- |
| **Title and abstract** | 1 | (*a*) Indicate the study’s design with a commonly used term in the title or the abstract | Line 24-25 |
| (*b*) Provide in the abstract an informative and balanced summary of what was done and what was found | Line 35-36 |
| Introduction | | | |
| Background/rationale | 2 | Explain the scientific background and rationale for the investigation being reported | Line 41-49 |
| Objectives | 3 | State specific objectives, including any prespecified hypotheses | Line 58-64 |
| Methods | | | |
| Study design | 4 | Present key elements of study design early in the paper | Line 68-80 |
| Setting | 5 | Describe the setting, locations, and relevant dates, including periods of recruitment, exposure, follow-up, and data collection | Line 68-72 |
| Participants | 6 | (*a*) Give the eligibility criteria, and the sources and methods of selection of participants. Describe methods of follow-up | Line 72-79 |
| (*b*)For matched studies, give matching criteria and number of exposed and unexposed | Line 69-70 |
| Variables | 7 | Clearly define all outcomes, exposures, predictors, potential confounders, and effect modifiers. Give diagnostic criteria, if applicable | Line 72-76 |
| Data sources/ measurement | 8* | For each variable of interest, give sources of data and details of methods of assessment (measurement). Describe comparability of assessment methods if there is more than one group | Line 87-95 |
| Bias | 9 | Describe any efforts to address potential sources of bias | Line 76-79 |
| Study size | 10 | Explain how the study size was arrived at | Line 68-70 |
| Quantitative variables | 11 | Explain how quantitative variables were handled in the analyses. If applicable, describe which groupings were chosen and why | Line 98-105 |
| Statistical methods | 12 | (*a*) Describe all statistical methods, including those used to control for confounding | Line 98-105 |
| (*b*) Describe any methods used to examine subgroups and interactions |  |
| (*c*) Explain how missing data were addressed |  |
| (*d*) If applicable, explain how loss to follow-up was addressed |  |
| (*e*) Describe any sensitivity analyses |  |
| Results | | |  |
| Participants | 13* | (a) Report numbers of individuals at each stage of study—eg numbers potentially eligible, examined for eligibility, confirmed eligible, included in the study, completing follow-up, and analysed | Line 109-110 |
| (b) Give reasons for non-participation at each stage | Line79 |
| (c) Consider use of a flow diagram | Fig 1 |
| Descriptive data | 14* | (a) Give characteristics of study participants (eg demographic, clinical, social) and information on exposures and potential confounders | Line 109-119 |
| (b) Indicate number of participants with missing data for each variable of interest | Fig 1 |
| (c) Summarise follow-up time (eg, average and total amount) | Line 68-69 |
| Outcome data | 15* | Report numbers of outcome events or summary measures over time | Line 109-110 |

| Main results | 16 | (*a*) Give unadjusted estimates and, if applicable, confounder-adjusted estimates and their precision (eg, 95% confidence interval). Make clear which confounders were adjusted for and why they were included | Table 2 |
| --- | --- | --- | --- |
| (*b*) Report category boundaries when continuous variables were categorized | table |
| (*c*) If relevant, consider translating estimates of relative risk into absolute risk for a meaningful time period | No |
| Other analyses | 17 | Report other analyses done—eg analyses of subgroups and interactions, and sensitivity analyses | No |
| Discussion | | | |
| Key results | 18 | Summarise key results with reference to study objectives | Line 138-142 |
| Limitations | 19 | Discuss limitations of the study, taking into account sources of potential bias or imprecision. Discuss both direction and magnitude of any potential bias | Line 162-164 |
| Interpretation | 20 | Give a cautious overall interpretation of results considering objectives, limitations, multiplicity of analyses, results from similar studies, and other relevant evidence | Line 207-209 |
| Generalisability | 21 | Discuss the generalisability (external validity) of the study results | Line 207-209 |
| Other information | | | |
| Funding | 22 | Give the source of funding and the role of the funders for the present study and, if applicable, for the original study on which the present article is based | Line 18-22 |

*Give information separately for exposed and unexposed groups.

**Note:** An Explanation and Elaboration article discusses each checklist item and gives methodological background and published examples of transparent reporting. The STROBE checklist is best used in conjunction with this article (freely available on the Web sites of PLoS Medicine at http://www.plosmedicine.org/, Annals of Internal Medicine at http://www.annals.org/, and Epidemiology at http://www.epidem.com/). Information on the STROBE Initiative is available at http://www.strobe-statement.org.
